# Supplementary material for: Clinical, Radiologic, and Functional Outcomes following Bone Grafting for Metacarpal Non-Unions: A Systematic Review
Source: MDPI journal article supplement (doi:10.3390/jcm13041148), 2024-02-18
Supplement: s1 [file s1]

**Table S1: Search Strategy**

*Table S1.1: EMBASE Search Strategy*

| Entry # | Query                                 | EMBASE |
|---------|---------------------------------------|--------|
| 1       | Bone graft*.mp.                       | 45132  |
| 2       | exp bone matrix/                      | 8280   |
| 3       | exp bone morphogenetic protein/       | 41804  |
| 4       | BMP.mp.                               | 29640  |
| 5       | exp bone transplantation/             | 51067  |
| 6       | exp bone development/                 | 108787 |
| 7       | exp bone regeneration/                | 35316  |
| 8       | Osteogenesis.mp.                      | 32532  |
| 9       | metacarpal ADJ3 non-union.mp.         | 5      |
| 10      | metacarpal ADJ3 nonunion.mp.          | 8      |
| 11      | metacarpal non union.mp.              | 2      |
| 12      | exp metacarpal bone/                  | 4790   |
| 13      | metacarpus.mp                         | 516    |
| 14      | metacarpal ADJ3 fracture.mp.          | 1484   |
| 15      | metacarpal.mp                         | 9145   |
| 16      | delayed union.mp.                     | 2654   |
| 17      | 15 AND 16                             | 21     |
| 18      | 1 OR 2 OR 3 OR 4 OR 5 OR 6 OR 7 OR 8  | 234706 |
| 19      | 9 OR 10 OR 11 OR 12 OR 13 OR 14 OR 17 | 6223   |
| 20      | 18 AND 19                             | 737    |

Table S1.2: MEDLINE Search Strategy

| Entry # | Query                                | MEDLINE |
|---------|--------------------------------------|---------|
| 1       | Bone graft*.mp.                      | 31372   |
| 2       | exp bone matrix/                     | 4250    |
| 3       | exp bone morphogenetic proteins/     | 22662   |
| 4       | BMP.mp.                              | 21600   |
| 5       | exp bone transplantation/            | 33782   |
| 6       | exp bone development/                | 71135   |
| 7       | exp bone regeneration/               | 28020   |
| 8       | exp osteogenesis/                    | 41571   |
| 9       | metacarpal ADJ3 non-union.mp.        | 4       |
| 10      | metacarpal ADJ3 nonunion.mp.         | 7       |
| 11      | metacarpal non union.mp.             | 2       |
| 12      | exp metacarpal bones/                | 1947    |
| 13      | exp metacarpus/                      | 3855    |
| 14      | metacarpal ADJ3 fracture.mp.         | 495     |
| 15      | 1 OR 2 OR 3 OR 4 OR 5 OR 6 OR 7 OR 8 | 161155  |
| 16      | 9 OR 10 OR 11 OR 12 OR 13 OR 14      | 5799    |
| 17      | 15 AND 16                            | 578     |

Table S1.3: Cochrane Library Search Strategy

| Entry # | Query                              | # of Results |
|---------|------------------------------------|--------------|
| 1       | bone graft*                        | 6216         |
| 2       | bone NEXT graft*                   | 2578         |
| 3       | MeSH [Bone Matrix]                 | 156          |
| 4       | MeSH [Bone Morphogenetic Proteins] | 187          |
| 5       | BMP                                | 526          |

|    |                                           |      |
|----|-------------------------------------------|------|
| 6  | MeSH [Bone Transplantation]               | 1061 |
| 7  | MeSH [Bone Development]                   | 790  |
| 8  | MeSH [Bone Regeneration]                  | 895  |
| 9  | MeSH [Osteogenesis]                       | 367  |
| 10 | metacarpal non-union                      | 8    |
| 11 | metacarpal nonunion                       | 12   |
| 12 | metacarpal non union                      | 13   |
| 13 | MeSH [Metacarpal Bones]                   | 38   |
| 14 | MeSH [Metacarpus]                         | 35   |
| 15 | metacarpal fracture                       | 135  |
| 16 | 1 OR 2 OR 3 OR 4 OR 5 OR 6 OR 7 OR 8 OR 9 | 8072 |
| 17 | 10 OR 11 OR 12 OR 13 OR 14 OR 15          | 182  |
| 18 | 16 AND 17                                 | 6    |

Table S2: Reasons for Exclusion

| Author, year             | Title                                                                                             | Reason for exclusion |
|--------------------------|---------------------------------------------------------------------------------------------------|----------------------|
| Aleksandrov et al., 2020 | Reconstruction of fingers using skin-bone grafts with microvascular anastomoses                   | Wrong intervention   |
| Brown, 1973              | The management of phalangeal and metacarpal fractures                                             | Wrong intervention   |
| Bruner, 1957             | Use of single iliac-bone graft to replace multiple metacarpal loss in dorsal injuries of the hand | Wrong intervention   |

|                                |                                                                                                                             |                        |
|--------------------------------|-----------------------------------------------------------------------------------------------------------------------------|------------------------|
| Cherkashin, 1964               | Replacement of metacarpal defects by the end section of the metatarsus                                                      | Other language         |
| Chin and Vedder, 2008          | MOS-PSSM CME article: Metacarpal fractures                                                                                  | Wrong intervention     |
| Cooke et al., 1973             | The fracture mechanics of bone – another look at composite modeling                                                         | Wrong population       |
| Del Pinal and Innocenti., 2007 | Evolving concepts in the management of the bone gap in the upper limb. Long and small defects                               | Review                 |
| D’Orio et al., 2023            | A functional “metacarpal-hand” after a firework injury obtained without any flap or toe-transfer                            | Wrong intervention     |
| Dy, 2020                       | What’s New in Hand and Wrist Surgery                                                                                        | Wrong publication type |
| Ebrahimzadeh and Jupiter, 2007 | Isolated Tuberculosis of a Metacarpal Bone in a 2-year-old child                                                            | Wrong publication type |
| Evans et al., 2008             | The use free, mainly cancellous bone grafts for reconstruction of phalanges and metacarpal bones following tumour resection | Wrong intervention     |
| Fallah et al., 2011            | Miniplating of metacarpal fractures: An outcome study                                                                       | Other language         |
| Fontaine et al., 2010          | Osseous vascular anatomy in the hand and wrist                                                                              | Other language         |
| Gajendran and Malone., 2015    | Management of complications with hand fractures                                                                             | Review                 |
| Gonzalez, 2007                 | Locked Intramedullary Nailing of Metacarpal Fractures Secondary to Gunshot Wounds                                           | Wrong publication type |
| Gonzalez et al., 1993          | Low-velocity gunshot wounds of the metacarpal: Treatment by early stable fixation and bone grafting                         | Wrong intervention     |
| Hammert, 2011                  | Treatment of Nonunion and Malunion Following Hand Fractures                                                                 | Review                 |

|                                |                                                                                                                                                                                       |                       |
|--------------------------------|---------------------------------------------------------------------------------------------------------------------------------------------------------------------------------------|-----------------------|
| Henneieng et al.,<br>1962      | Repair of loss of metacarpal substance with the aid of iliac grafts                                                                                                                   | Other language        |
| Hsu et al., 2018               | Chimeric medial femoral condyle osteocutaneous flap for reconstruction of multiple metacarpal defects                                                                                 | Review                |
| Huffman and<br>Rayan, 2011     | Thumb metacarpophalangeal arthrodesis with local bone grafting                                                                                                                        | Wrong<br>population   |
| Innocenti et al.,<br>2006      | The use of allografts in hand surgery                                                                                                                                                 | Other language        |
| Jamini et al., 2010            | Reconstruction of the second metacarpal bone with a free vascularized scapular bone flap combined with nonvascularized free osteochondral grafts from both second toes: A Case Report | Wrong<br>intervention |
| Jones Jr et al., 2012          | Free vascularized medial femoral condyle autograft for challenging upper extremity nonunions                                                                                          | Review                |
| Jupiter et al., 2007           | Posttraumatic reconstruction in the hand                                                                                                                                              | Wrong<br>intervention |
| Kettelkamp, 1972               | Experimental autologous joint transplantation                                                                                                                                         | Wrong<br>population   |
| Kettlekamp and<br>Ramsey, 1971 | Experimental and clinical autogenous distal metacarpal reconstruction                                                                                                                 | Wrong<br>population   |
| Kolaityte et al.,<br>2022      | Intra-medullary Cannulated Headless Compression Screw for Bone Graft Fixation in Metacarpal Fractures                                                                                 | Wrong<br>intervention |
| Kremer et al., 2006            | Outcome Assessment after reconstruction of complex defects of the forearm and hand with osteocutaneous free flaps                                                                     | Wrong<br>intervention |
| Lee et al. 2000                | Reconstruction of composite metacarpal defects using a fibula free flap                                                                                                               | Wrong<br>intervention |

|                             |                                                                                                                          |                        |
|-----------------------------|--------------------------------------------------------------------------------------------------------------------------|------------------------|
| Moris et al., 2016          | Functional and radiographic evaluation of the treatment of traumatic bone loss of the hand using the Masquelet technique | Wrong intervention     |
| Murata, 2015                | Vascularized bone grafts to the upper extremities                                                                        | Full-text not found    |
| Nanno et al., 2007          | Dorsal fracture dislocations of the second and third carpometacarpal joints                                              | Wrong publication type |
| Nathan and Chatterjee, 2005 | Silastic replacement of metacarpal after resection of giant cell tumor. A case report                                    | Wrong publication type |
| Omokawa, 2006               | The anatomical basis for reverse first to fifth dorsal metacarpal arterial flaps                                         | Wrong publication type |
| Picardo et al., 2021        | Iliac crest bone grafting for metacarpal bone defects using bridging bone block                                          | Wrong publication type |
| Poitevein, 2002             | Trephine bone grafting technique                                                                                         | Wrong intervention     |
| Ring, 2006                  | Malunion and nonunion of the metacarpals and phalanges                                                                   | Review                 |
| Rodriguez et al., 2022      | Free medial femoral condyle flap for phalangeal and metacarpal bone reconstruction                                       | Wrong intervention     |
| Shipachev, 1958             | Metacarpal bone graft in reconstruction of the fingers and hand                                                          | Other language         |
| Singh et al., 2013          | Percutaneous autologous bone marrow injections for delayed or non-union of bones                                         | Wrong intervention     |
| Soucacos et al., 2006       | Vascularized bone grafts for the management of non-union                                                                 | Review                 |
| Suematsu et al., 1987       | Postoperative course of patients treated with iliac osteocutaneous free flaps. A two-to five-year follow-up study        | Wrong intervention     |

|                            |                                                                                           |                    |
|----------------------------|-------------------------------------------------------------------------------------------|--------------------|
| Verega, 2017               | Associated bone and soft tissue defects of the hand solved with vascularized bone plastys | Wrong intervention |
| Williams and Lochner, 2013 | Pediatric hand and wrist injuries                                                         | Wrong intervention |
| Yajima et al., 1999        | Free vascularized fibula grafts in surgery of the upper limb                              | Wrong intervention |
| Yong et al., 2007          | Trapezoid rotational bone graft osteotomy for metacarpal and phalangeal fracture malunion | Wrong intervention |

Table S3: Data Points Extracted

| Category                   | Datapoint                                                                                                                                                                                                                                                                                                                                                                  |
|----------------------------|----------------------------------------------------------------------------------------------------------------------------------------------------------------------------------------------------------------------------------------------------------------------------------------------------------------------------------------------------------------------------|
| Study Characteristics      | <div><div>– Article Title</div><div>– Author</div><div>– Year</div><div>– Country of publication</div><div>– Funding Source</div><div>– Methodology (Study type)</div></div>                                                                                                                                                                                               |
| Population Characteristics | <div><div>– Number of participants</div><div>– Sex</div><div>– Mean Age (range)</div><div>– Initial Injury</div><div>– Affected Metacarpal</div><div>– Time from injury until graft</div><div>– Number of prior bone operations</div><div>– Type of Nonunion (e.g., reactive, hypertrophic, etc.)</div><div>– Type of Bone Graft</div><div>– Graft vascularity</div></div> |
| Outcomes                   | <div><div>– Post-Op management</div><div>– Time to Follow-Up (in months) (range)</div></div>                                                                                                                                                                                                                                                                               |

|  |                                                                                                                                                                                                                                                                                                                                                                                                                                                                                               |
|--|-----------------------------------------------------------------------------------------------------------------------------------------------------------------------------------------------------------------------------------------------------------------------------------------------------------------------------------------------------------------------------------------------------------------------------------------------------------------------------------------------|
|  | <ul style="list-style-type: none"><li>– Time to Bone fusion/union (in months) (range)</li><li>– Rates of non-union/failure of bone graft</li><li>– Radiologic Outcomes</li><li>– VAS Score</li><li>– Post operative pain</li><li>– Range of motion (ROM)</li><li>– Grip strength (Kg)</li><li>– Pinch strength</li><li>– Complications</li><li>– Return to Activities of Daily Living (ADLs)</li><li>– Patient satisfaction</li><li>– Sensation</li><li>– Nonunion due to infection</li></ul> |
|--|-----------------------------------------------------------------------------------------------------------------------------------------------------------------------------------------------------------------------------------------------------------------------------------------------------------------------------------------------------------------------------------------------------------------------------------------------------------------------------------------------|



**Table S4: Study Characteristics**

| Study           | Year | Study Type                   | Funding Source | Country     | Purpose/Aim                                                                                                                                                                                         |
|-----------------|------|------------------------------|----------------|-------------|-----------------------------------------------------------------------------------------------------------------------------------------------------------------------------------------------------|
| Aguilera et al. | 2022 | Retrospective<br>Case Series | None           | Spain       | Describe an original technique with a fixation method for the treatment of metacarpal non-union and report a series of three cases.                                                                 |
| Akmaz et al.    | 2004 | Prospective<br>Cohort        | None           | Turkey      | Evaluate the treatment approach and functional outcomes of surgical reconstruction performed on individuals who have sustained metacarpal shaft defects as a result of gunshot wounds.              |
| Anderson et al. | 2022 | Case Report                  | None           | USA         | Act as an educational tool for the rising reconstructive surgeon explaining the ‘when, why and how’ for perioperative management.                                                                   |
| Christen et al. | 2022 | Prospective<br>Cohort        | Yes            | Switzerland | Investigate the osteogenic capacity, the advantages, and the outcome of free periosteal-only medial femoral condyle flaps in patients with metacarpal non-union with impaired bone vascularization. |
| Cogsil et al.   | 2022 | Retrospective<br>Case Series | None           | USA         | Describe a new surgical technique using an iliac crest "top hat" bone graft to treat refractory metacarpal for when initial surgical treatment of metacarpal non-union is unsuccessful.             |

|                        |      |                            |      |        |                                                                                                                                           |
|------------------------|------|----------------------------|------|--------|-------------------------------------------------------------------------------------------------------------------------------------------|
| Deng et Al.            | 2020 | Case Report                | None | China  | Summarize the current application of vascularized small bone grafting for fracture non-union and bony defects.                            |
| Doi and Sakai          | 1994 | Case Report                | NR   | Japan  | Describes clinical applications of the vascularized periosteal bone graft to treat patients with fracture non-union.                      |
| Ebraheim et al.        | 1997 | Case Report                | NR   | USA    | Report the use of an AO mini fixator and autogenous iliac crest graft for segmental defects of the metacarpals.                           |
| Erçin et al.           | 2022 | Retrospective Cohort Study | None | Turkey | Present adipofascial and periosteal tissue technical modifications and results for MFC free flap monitoring.                              |
| Ferguson and Bogoch    | 1999 | Case Report                | NR   | Canada | Describe the case of an unusual seronegative monoarthropathy of the right wrist and who was treated with fusion by the method of Clayton. |
| Ireland and Taleisnkik | 1986 | Case Report                | NR   | USA    | Present cases, review the literature on the subject, and discuss factors that contributed to the development of delayed and non-unions.   |
| Jupiter et al.         | 1985 | Retrospective Cohort Study | NR   | USA    | Review a consecutive series of 25 phalangeal and metacarpal non-union and delayed unions.                                                 |

|                    |      |                    |      |        |                                                                                                                                                                                                 |
|--------------------|------|--------------------|------|--------|-------------------------------------------------------------------------------------------------------------------------------------------------------------------------------------------------|
| Milhoan et al.     | 2022 | Case Report        | None | USA    | Present a technique for managing metacarpal bone loss utilizing a tri-cortical iliac crest graft and an intramedullary metacarpal nail for the treatment of metacarpal fractures and non-union. |
| Sakai et al.       | 1988 | Case Report        | NR   | Japan  | Describe a new vascularized thin corticoperiosteal graft harvested from the medial condylar and supracondylar areas of the femur.                                                               |
| Tsai et al.        | 1981 | Case Report        | NR   | USA    | Describe nine instances of combined second and third toe-to-hand transfers for severe transmetacarpal mutilating hand injuries.                                                                 |
| Vegas et al.       | 2012 | Prospective cohort | NR   | Spain  | Evaluate the efficacy of periosteal-only transfers from the medial femoral condyle in the treatment of recalcitrant non-unions.                                                                 |
| Wei et al.         | 1999 | Case Report        | NR   | Taiwan | Present experiences in bilateral metacarpal hand reconstruction with multiple-toe transplantations in a series of six patients                                                                  |
| Zargarbashi et al. | 2018 | Case Report        | None | Iran   | Present a two-year-old boy with a non-union of metacarpal fractures, treated with open reduction/internal fixation and bone graft.                                                              |

NR: Not reported

Table S5.1: Patient Characteristics

| Study                  | N | Sex          | Mean Age (Range) | Initial Injury                                                          | Initial Interventions                                                                            | Affected Metacarpal         | Time from injury |
|------------------------|---|--------------|------------------|-------------------------------------------------------------------------|--------------------------------------------------------------------------------------------------|-----------------------------|------------------|
| Aguilera et al. (2022) | 4 | M: 3<br>F: 1 | 44.5<br>(29-73)  | M1: Oblique long comminuted and deviated fracture                       | M1: ORIF, then cast<br>M2: Internal fixation<br>M3: ORIF<br>F: Conversative                      | M1: 3rd metacarpal          | M1: 3.5 m        |
|                        |   |              |                  | M2: Short oblique fracture                                              |                                                                                                  | M2: 3rd metacarpal          | M2: 6 m          |
|                        |   |              |                  | M3: Rotated and shortened transverse fracture from the distal diaphysis |                                                                                                  | M3: 4th metacarpal          | M3: 4 m          |
|                        |   |              |                  | F1: long oblique fracture of the diaphysis                              |                                                                                                  | F1: 5th metacarpal          | F1: 5 m          |
|                        |   |              |                  |                                                                         |                                                                                                  |                             |                  |
| Akmaz et al. (2004)    | 8 | M: 8         | 22<br>(20-25)    | Gunshot wounds                                                          | Debridement/skin closure                                                                         | M1: 2nd and 3rd metacarpals | M1: 11 m         |
|                        |   |              |                  |                                                                         |                                                                                                  | M2: 3rd metacarpal          | M2: 11 m         |
|                        |   |              |                  |                                                                         |                                                                                                  | M3: 3rd metacarpal          | M3: 8 m          |
|                        |   |              |                  |                                                                         |                                                                                                  | M4: 3rd metacarpal          | M4: 15 m         |
|                        |   |              |                  |                                                                         |                                                                                                  | M5: 3rd metacarpal          | M5: 10 m         |
|                        |   |              |                  |                                                                         |                                                                                                  | M6: 3rd metacarpal          | M6: 7 m          |
|                        |   |              |                  |                                                                         |                                                                                                  | M7: 3rd metacarpal          | M7: 10 m         |
|                        |   |              |                  |                                                                         |                                                                                                  | M8: 4th metacarpal          | M8: 8 m          |
| Anderson et al. (2022) | 1 | M: 1<br>F: 0 | 38               | Mangled crush injury to the left hand                                   | Debridement//pin insertion/K-wires, then debridement/skin graft, then debridement/K-wire removal | 3rd metacarpal              | 7 m              |
|                        |   |              |                  |                                                                         |                                                                                                  |                             |                  |

|                           |   |              |                  |                                                                                                                                                    |                                                                                                                                                                                                      |                                                                                                                                                           |                                                      |
|---------------------------|---|--------------|------------------|----------------------------------------------------------------------------------------------------------------------------------------------------|------------------------------------------------------------------------------------------------------------------------------------------------------------------------------------------------------|-----------------------------------------------------------------------------------------------------------------------------------------------------------|------------------------------------------------------|
| Christen et al.<br>(2022) | 4 | M: 2<br>F: 2 | 27.25<br>(16-32) | P1: Blast trauma, open<br>P2: Gunshot trauma, open<br>P3: Saw trauma, open<br>P4: Blunt trauma, closed                                             | P1: ORIF/K-wire/cement<br>P2: ORIF/K-wire<br>P3: ORIF<br>P4: ORIF                                                                                                                                    | P1: Diaphyseal,<br>multifragmentary<br>P2: Diaphyseal,<br>multifragmentary<br>P3: Metaphyseal,<br>multifragmentary<br>P4: Diaphyseal,<br>multifragmentary | P1: 8.8 m<br>P2: 2.13 m<br>P3: 9.96 m<br>P4: 16.63 m |
| Cogsil et al.<br>(2022)   | 2 | M: 1<br>F: 1 | 31.5<br>(31-32)  | M: Traumatic work injury due to a<br>bandsaw<br>F: Right thumb open fracture<br>dislocation and degloving injury<br>incurred using a wood splitter | M: Ray resection/finger<br>transposition/plate, then<br>reduction/plate fixation/bone<br>grafting<br>F: Amputation, then<br>osteotomy/unilateral external<br>fixation, then ORIF/bone<br>graft/plate | M: 3rd metacarpal<br>F: 1st metacarpal                                                                                                                    | M: 18 m<br>F: 14 m                                   |
| Deng et Al.<br>(2020)     | 1 | M: 1<br>F: 0 | 31               | Intra-articular fracture of the<br>metacarpal head                                                                                                 | Screw insertion/removal                                                                                                                                                                              | 4th metacarpal                                                                                                                                            | 14 m                                                 |
| Doi and Sakai<br>(1994)   | 1 | M: 1<br>F: 0 | 36               | Open fracture                                                                                                                                      | Plates/screws                                                                                                                                                                                        | Metacarpal shaft                                                                                                                                          | NR                                                   |
| Ebraheim et al.<br>(1997) | 1 | M: 1<br>F: 0 | 30               | Displaced closed fracture of fourth<br>metacarpal                                                                                                  | ORIF/K-wires/tension-band<br>wiring                                                                                                                                                                  | 5th metacarpal                                                                                                                                            | 2 m                                                  |

|                                     |    |              |                 |                                                                                                                                                                                                                                                                                             |                                                                                                                                             |                                                                                                                                                      |                                                                   |
|-------------------------------------|----|--------------|-----------------|---------------------------------------------------------------------------------------------------------------------------------------------------------------------------------------------------------------------------------------------------------------------------------------------|---------------------------------------------------------------------------------------------------------------------------------------------|------------------------------------------------------------------------------------------------------------------------------------------------------|-------------------------------------------------------------------|
| Erçin et al.<br>(2022)              | 11 | M: 9<br>F: 2 | 35.5<br>(22-47) | Crush injury (M): 5<br>Gun injury (F): 2<br>Gun injury (M): 4                                                                                                                                                                                                                               | NR                                                                                                                                          | NR                                                                                                                                                   | NR                                                                |
| Ferguson and<br>Bogoch (1999)       | 1  | M: 0<br>F: 1 | 36              | Seronegative arthritis                                                                                                                                                                                                                                                                      | Debridement, then wrist<br>fusion, then Steinmann pin<br>insertion/removal, then<br>fiberglass splint, then<br>debridement/T-plate fixation | 3rd metacarpal                                                                                                                                       | 29 m                                                              |
| Ireland and<br>Taleisnkik<br>(1986) | 1  | M: 0<br>F: 1 | 10              | Closed shaft fractures                                                                                                                                                                                                                                                                      | Cast                                                                                                                                        | 2nd and 3rd metacarpals                                                                                                                              | 7 m                                                               |
| Jupiter et al.<br>(1985)            | 6  | M: 6<br>F: 0 | 24.5<br>(20-31) | P1: Direct blow (closed midshaft<br>fracture)<br>P2: Crush, degloving (open proximal<br>1/3 fracture)<br>P3: Rotary blade (open fracture)<br>P4: Direct blow (closed midshaft<br>fracture)<br>P5: Crush, degloving (open base<br>fracture)<br>P6: Direct blow (closed midshaft<br>fracture) | P1: Splint<br>P2: ORIF/K-wires<br>P3: ORIF/K-wires x2<br>P4: ORIF/K-wires<br>P5: ORIF/K-wires x2<br>P6: ORIF                                | P1: 5th metacarpal<br>P2: 3rd metacarpal<br>P3: 4th metacarpal<br>P4: 2nd metacarpal<br>P5: 2nd and 3 <sup>rd</sup> metacarpal<br>P6: 4th metacarpal | P1: 12 m<br>P2: 6 m<br>P3: 6 m<br>P4: 12 m<br>P5: 11 m<br>P6: 4 m |

|                              |   |              |    |                                                     |                                                                                                            |                                                                  |      |
|------------------------------|---|--------------|----|-----------------------------------------------------|------------------------------------------------------------------------------------------------------------|------------------------------------------------------------------|------|
| Milhoan et al.<br>(2022)     | 1 | M: 1<br>F: 0 | 19 | Crush injury of previously treated<br>gunshot wound | ORIF                                                                                                       | 4th metacarpal                                                   | 13 m |
| Sakai et al.<br>(1988)       | 1 | M: 1<br>F: 0 | 36 | Open fracture                                       | Debridement/primary closure,<br>then plates/screws, then<br>curettage x3, then K-wires                     | 2nd metacarpal                                                   | 4 m  |
| Tsai et al.<br>(1981)        | 1 | M: 1<br>F: 0 | 60 | Degloving injury to the thumb and<br>four fingers   | Debridement/primary closure<br>then phalanx/toe<br>transplantation                                         | 1st and 5th MCP joint, 3rd<br>and 4th through metacarpal<br>base | 28 m |
| Vegas et al.<br>(2012)       | 1 | M: 1<br>F: 0 | 37 | NR                                                  | Internal fixation/bone graft                                                                               | NR                                                               | NR   |
| Wei et al.<br>(1999)         | 1 | M: 1<br>F: 0 | 21 | Industrial injury                                   | Stumped coverage using<br>pedicled groin flaps, then toe<br>transplantation with second-<br>ray amputation | 3rd metacarpal                                                   | 7 m  |
| Zargarbashi et<br>al. (2018) | 1 | M: 1<br>F: 0 | 2  | Crush injury                                        | Fasciotomy, then splint x4 w                                                                               | 4th and 5th metacarpal                                           | 8 m  |

F: Female; M: Male; m: months; MCP: metacarpophalangeal; NR: Not Reported; N: number of participants; ORIF: open reduction and internal fixation; P: patient; w: weeks

**Table S5.2: Patient Characteristics continued**

| Study                     | Type of Bone Graft                                    | Graft Vascularity                                                  | # of Prior Bone Operations | Type of Non-union | Non-union due to infection |
|---------------------------|-------------------------------------------------------|--------------------------------------------------------------------|----------------------------|-------------------|----------------------------|
| Aguilera et al.<br>(2022) | M1: Autologous distal radius bone graft               | NR                                                                 | M1: 1                      | M1: Atrophic      | None                       |
|                           | M2: Distal radius bone graft                          |                                                                    | M2: 1                      | M2: Hypertrophic  |                            |
|                           | M3: NR                                                |                                                                    | M3: 1                      | M3: NR            |                            |
|                           | F: NR                                                 |                                                                    | F1: 0                      | F1: NR            |                            |
| Akmaz et al.<br>(2004)    | Tricortical iliac bone graft                          | NR                                                                 | 1                          | NR                | None                       |
| Anderson et al.<br>(2022) | Autologous cancellous dorsal distal radius bone graft | NR                                                                 | 1                          | NR                | None                       |
| Christen et al.<br>(2022) | Cancellous bone graft + Autograft                     | Descending genicular artery: 3<br>Superomedial genicular artery: 1 | NR                         | NR                | None                       |
| Cogsil et al.<br>(2022)   | Iliac crest top hat bone graft                        | NR                                                                 | M: 2<br>F: 2               | NR                | None                       |
| Deng et Al.<br>(2020)     | Osteochondral medial femoral condyle graft            | Pedicle anastomosed end-to-end to the<br>2nd metacarpal artery     | 1                          | NR                | None                       |
| Doi and Sakai<br>(1994)   | Vascularized corticoperiosteal graft                  | NR                                                                 | 4                          | NR                | 1/1                        |
| Ebraheim et al.<br>(1997) | Cancellous iliac bone graft                           | NR                                                                 | 2                          | NR                | 1/1                        |



|                               |                                                                                                                                                                                  |                                                          |                                                    |          |      |
|-------------------------------|----------------------------------------------------------------------------------------------------------------------------------------------------------------------------------|----------------------------------------------------------|----------------------------------------------------|----------|------|
| Erçin et al.<br>(2022)        | Medial femoral condyle flap                                                                                                                                                      | Descending genicular artery                              | NR                                                 | NR       | None |
| Ferguson and Bogoch (1999)    | Failed small corticocancellous iliac crest bone graft, followed by 2 cm tricortical iliac crest bone graft                                                                       | NR                                                       | 2                                                  | Atrophic | None |
| Ireland and Taleisnkik (1986) | NR                                                                                                                                                                               | NR                                                       | 0                                                  | NR       | None |
| Jupiter et al.<br>(1985)      | P1: Bone graft<br>P2: Iliac crest bone graft without internal fixation<br>P3: Bone graft<br>P4: Bone graft<br>P5: Autogenous iliac crest bone graft and K-wire<br>P6: Bone graft | NR                                                       | P1: 0<br>P2: 1<br>P3: 1<br>P4: 1<br>P5: 1<br>P6: 1 | NR       | 1/6  |
| Milhoan et al.<br>(2022)      | Tri-cortical iliac crest bone graft                                                                                                                                              | NR                                                       | 1                                                  | NR       | None |
| Sakai et al.<br>(1988)        | Free vascularized corticoperiosteal graft from medial condylar and supracondylar areas of the femur                                                                              | Dorsal branch of the radial artery and its vena comitans | 4                                                  | Atrophic | 1/1  |

|                              |                                                                          |    |   |              |      |
|------------------------------|--------------------------------------------------------------------------|----|---|--------------|------|
| Tsai et al.<br>(1981)        | NR                                                                       | NR | 2 | NR           | NR   |
| Vegas et al.<br>(2012)       | Corticoperiosteal vascularized bone graft<br>from medial femoral condyle | NR | 1 | Recalcitrant | NR   |
| Wei et al.<br>(1999)         | Iliac bone graft                                                         | NR | 3 | NR           | None |
| Zargarbashi et<br>al. (2018) | Iliac crest intercalary bone graft                                       | NR | 0 | Atrophic     | None |

F: Female; M: Male; NR: Not Reported; N: number of participants; P: patient
